# Supplementary material
Source: PubMed Central journal article supplement (PMC4551430)

## Supplementary Online Content

Fontanella CA, Hiance-Steelesmith DL, Phillips GS, et al. Widening rural-urban disparities in youth suicides, United States, 1996-2010. *JAMA Pediatr*. Published online March 9, 2015. doi:10.1001/jamapediatrics.2014.3561.

**eTable 1.** Description of Rural-Urban Classification Codes

**eTable 2.** Age-Adjusted Mortality Rates for Suicides by Poisoning and Other Methods

**eFigure.** Adolescent Suicide Incidence Rate Ratio (IRR) for the Most Rural County Type Relative to the Most Urban County Type for Males and Females by Poisoning (A) and Other Methods (B), US 1996-2010

This supplementary material has been provided by the authors to give readers additional information about their work.

**eTable 1. Description of Rural-Urban Classification Codes**

| Code | Description                                                                        | Number of counties | Proportion of US population <sup>a</sup> |
|------|------------------------------------------------------------------------------------|--------------------|------------------------------------------|
| 1    | Counties in metro areas of 1 million population or more                            | 413                | 53.03                                    |
| 2    | Counties in metro areas of 250,000 to 1 million population                         | 325                | 19.73                                    |
| 3    | Counties in metro areas of fewer than 250,000 population                           | 351                | 9.89                                     |
| 4    | Urban population of 20,000 or more, adjacent to a metro area                       | 218                | 5.13                                     |
| 5    | Urban population of 20,000 or more, not adjacent to a metro area                   | 105                | 1.98                                     |
| 6    | Urban population of 2,500 to 19,999, adjacent to a metro area                      | 609                | 5.38                                     |
| 7    | Urban population of 2,500 to 19,999, not adjacent to a metro area                  | 450                | 3.01                                     |
| 8    | Completely rural or less than 2,500 urban population, adjacent to a metro area     | 235                | 0.86                                     |
| 9    | Completely rural or less than 2,500 urban population, not adjacent to a metro area | 435                | 1.00                                     |

<sup>a</sup>Population is from the 2000 US Census.

**eTable 2. Age-Adjusted Mortality Rates for Suicides by Poisoning and Other Methods**

|                  | 1996-1998 | 1999-2001 | 2002-2004 | 2005-2007 | 2008-2010 | slope  | p-value |
|------------------|-----------|-----------|-----------|-----------|-----------|--------|---------|
| <b>Poisoning</b> |           |           |           |           |           |        |         |
| Males            |           |           |           |           |           |        |         |
| 1 (most urban)   | 0.69      | 0.67      | 0.64      | 0.62      | 0.59      | -0.013 | 0.008   |
| 2                | 0.81      | 0.78      | 0.75      | 0.72      | 0.69      | -0.013 | 0.011   |
| 3                | 0.76      | 0.74      | 0.73      | 0.72      | 0.70      | -0.006 | 0.258   |
| 4                | 0.77      | 0.76      | 0.76      | 0.76      | 0.75      | -0.001 | 0.838   |
| 5                | 0.48      | 0.50      | 0.53      | 0.56      | 0.59      | 0.016  | 0.043   |
| 6                | 0.69      | 0.66      | 0.64      | 0.62      | 0.60      | -0.011 | 0.078   |
| 7                | 0.84      | 0.85      | 0.87      | 0.88      | 0.90      | 0.004  | 0.518   |
| 8/9 (most rural) | 0.55      | 0.57      | 0.58      | 0.60      | 0.62      | 0.009  | 0.230   |
| Females          |           |           |           |           |           |        |         |
| 1 (most urban)   | 0.44      | 0.44      | 0.43      | 0.43      | 0.43      | -0.003 | 0.603   |
| 2                | 0.47      | 0.48      | 0.48      | 0.49      | 0.49      | 0.002  | 0.787   |
| 3                | 0.41      | 0.42      | 0.43      | 0.43      | 0.44      | 0.003  | 0.704   |
| 4                | 0.37      | 0.37      | 0.37      | 0.36      | 0.36      | -0.004 | 0.694   |
| 5                | 0.49      | 0.51      | 0.53      | 0.55      | 0.58      | 0.010  | 0.548   |
| 6                | 0.35      | 0.37      | 0.39      | 0.41      | 0.43      | 0.018  | 0.092   |
| 7                | 0.43      | 0.46      | 0.49      | 0.52      | 0.56      | 0.022  | 0.094   |
| 8/9 (most rural) | 0.33      | 0.36      | 0.39      | 0.42      | 0.46      | 0.032  | 0.062   |
| <b>Other</b>     |           |           |           |           |           |        |         |
| Males            |           |           |           |           |           |        |         |
| 1 (most urban)   | 0.87      | 0.89      | 0.91      | 0.93      | 0.95      | 0.007  | 0.124   |
| 2                | 0.66      | 0.67      | 0.69      | 0.70      | 0.71      | 0.006  | 0.193   |
| 3                | 0.58      | 0.60      | 0.63      | 0.66      | 0.68      | 0.013  | 0.012   |
| 4                | 0.53      | 0.56      | 0.60      | 0.63      | 0.67      | 0.018  | 0.003   |
| 5                | 0.49      | 0.55      | 0.62      | 0.70      | 0.78      | 0.036  | < 0.001 |
| 6                | 0.43      | 0.45      | 0.46      | 0.47      | 0.48      | 0.009  | 0.137   |
| 7                | 0.53      | 0.58      | 0.62      | 0.68      | 0.73      | 0.024  | < 0.001 |
| 8/9 (most rural) | 0.46      | 0.50      | 0.55      | 0.60      | 0.65      | 0.029  | < 0.001 |

| Females          |      |      |      |      |      |        |       |
|------------------|------|------|------|------|------|--------|-------|
| 1 (most urban)   | 0.25 | 0.25 | 0.24 | 0.24 | 0.23 | -0.003 | 0.758 |
| 2                | 0.20 | 0.20 | 0.20 | 0.20 | 0.20 | 0.002  | 0.789 |
| 3                | 0.16 | 0.16 | 0.16 | 0.16 | 0.16 | 0.004  | 0.718 |
| 4                | 0.16 | 0.16 | 0.15 | 0.15 | 0.15 | -0.004 | 0.762 |
| 5                | 0.17 | 0.18 | 0.18 | 0.19 | 0.19 | 0.010  | 0.558 |
| 6                | 0.14 | 0.15 | 0.15 | 0.16 | 0.17 | 0.019  | 0.129 |
| 7                | 0.16 | 0.17 | 0.18 | 0.19 | 0.20 | 0.023  | 0.120 |
| 8/9 (most rural) | 0.13 | 0.14 | 0.15 | 0.16 | 0.17 | 0.033  | 0.072 |

Note. Suicide rates per 100,000 population.

**eFigure. Adolescent Suicide Incidence Rate Ratio (IRR) for the Most Rural County Type Relative to the Most Urban County Type for Males and Females by Poisoning (A) and Other Methods (B), US 1996-2010**

**Legend**  
 — Age-adjusted rates  
 - - - - Age- and contextually adjusted rates  
 Error bars are 95% confidence intervals for the IRR

(A) Poisoning

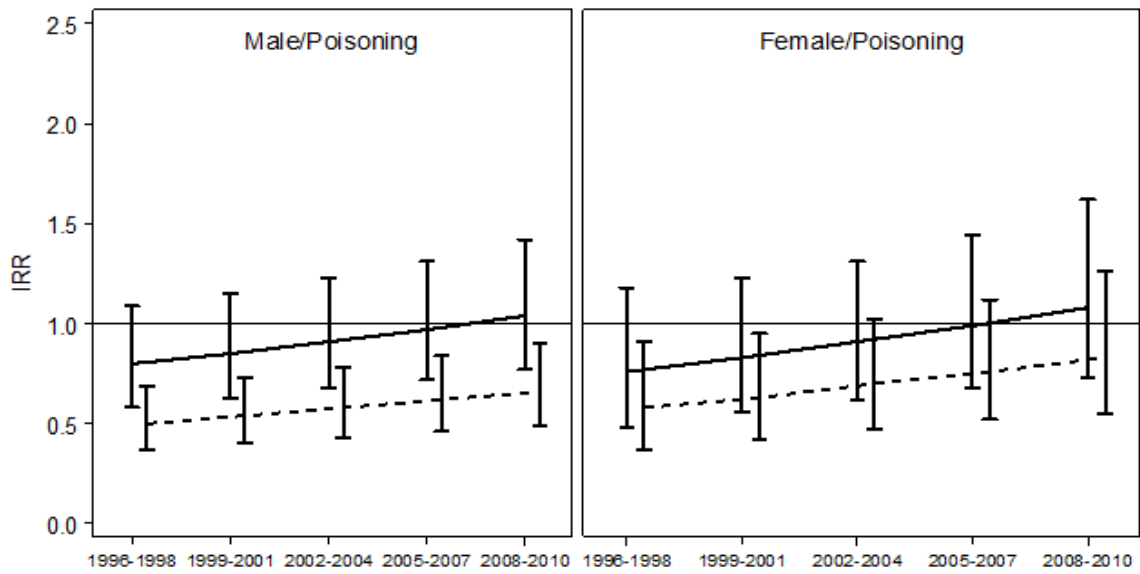

(B) Other Methods

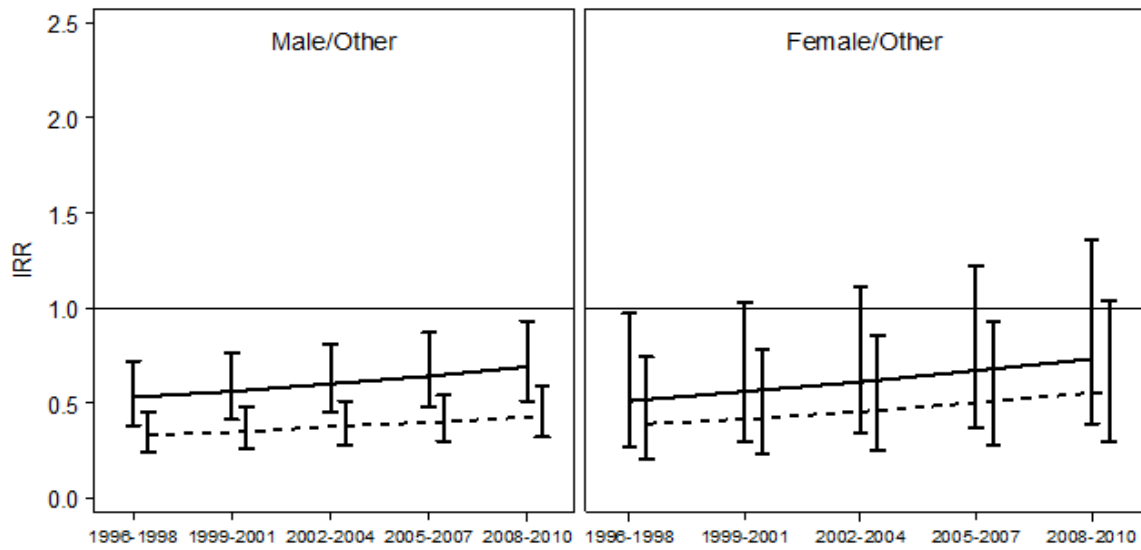

Supplement: NIHMS716375-supplement-Tables_1___2_and_Figure.pdf [file NIHMS716375-supplement-Tables_1___2_and_Figure.pdf]
